# Supplementary material
Source: PubMed Central journal article supplement (PMC3464030)
Supplement: supp_112.197020_jpet_197020_suppl_table_1.pdf [file supp_112.197020_jpet_197020_suppl_table_1.pdf]

**Chronic Treatment with a Broad Spectrum MMP Inhibitor, Doxycycline, Prevents the Development of Spontaneous Aortic Lesions in the Mouse Model of Vascular Ehlers-Danlos Syndrome**

**Hyun-Jin Tae, Shannon Marshall, Jing Zhang, Mingyi Wang, Wilfried Briest, and Mark I. Talan**

**Journal of Experimental Pharmacology and therapeutics**

**Supplemental Table 1.** Body weight and weight of different organs of 9-mo old WT and HT untreated or treated with doxycycline since weaning

|         | BW (g)       | Heart / BW  | Lung / BW   | Liver / BW  | Spleen / BW | Kidney / BW | Testis / BW |
|---------|--------------|-------------|-------------|-------------|-------------|-------------|-------------|
| WT      | 31.621±1.146 | 0.605±0.014 | 0.717±0.037 | 5.284±0.197 | 0.368±0.010 | 1.046±0.053 | 0.308±0.047 |
| WT+Doxy | 36.538±1.023 | 0.581±0.018 | 0.785±0.063 | 5.128±0.202 | 0.332±0.022 | 1.041±0.031 | 0.267±0.015 |
| HT      | 33.325±1.108 | 0.719±.046  | 0.751±0.058 | 5.353±0.227 | 0.378±0.046 | 1.146±0.072 | 0.281±0.076 |
| HT+Doxy | 34.393±0.894 | 0.701±0.089 | 0.832±0.134 | 4.935±0.129 | 0.336±0.028 | 1.074±0.046 | 0.447±0.183 |

Values are Means±S.E.M.
