# Supplementary material
Source: PubMed Central journal article supplement (PMC3464030)
Supplement: supp_112.197020_jpet_197020_suppl_table_2.pdf [file supp_112.197020_jpet_197020_suppl_table_2.pdf]

**Chronic Treatment with a Broad Spectrum MMP Inhibitor, Doxycycline, Prevents the Development of Spontaneous Aortic Lesions in the Mouse Model of Vascular Ehlers-Danlos Syndrome**

**Hyun-Jin Tae, Shannon Marshall, Jing Zhang, Mingyi Wang, Wilfried Briest, and Mark I. Talan**

**Journal of Experimental Pharmacology and therapeutics**

**Supplemental Table 2.** Collagen content in aorta

|                       | WT                    | WT+Doxy               | HT                    | HT+Doxy                | ANOVA |
|-----------------------|-----------------------|-----------------------|-----------------------|------------------------|-------|
| Tunica media (%)      |                       |                       |                       |                        |       |
| Thoracic aorta        | 33.2±2.1 <sup>A</sup> | 32.1±1.7 <sup>A</sup> | 24.7±2.8 <sup>B</sup> | 31.1±0.8 <sup>A</sup>  | *     |
| Abdominal aorta       | 33.8±3.8 <sup>A</sup> | 34.6±2.7 <sup>A</sup> | 23.7±1.9 <sup>B</sup> | 30.0±2.9 <sup>AB</sup> | *     |
| Tunica Adventitia (%) |                       |                       |                       |                        |       |
| Thoracic aorta        | 78.3±2.9              | 76.4±1.5              | 72.4±3.5              | 78.4±3.0               |       |
| Abdominal aorta       | 79.4±1.6              | 79.1±1.0              | 76.6±3.0              | 78.4±3.2               |       |
| Total aortic wall (%) |                       |                       |                       |                        |       |
| Thoracic aorta        | 50.4±1.9              | 48.7±1.7              | 45.3±4.0              | 47.7±1.1               |       |
| Abdominal aorta       | 56.3±3.8              | 53.2±2.6              | 50.8±2.4              | 55.9±3.3               |       |

Values are means±S.E.M; \* - p<0.05, ANOVA with post-hoc Tukey test: significant differences (p<0.05) between groups marked by different letters.
